# Supplementary material
Source: PubMed Central journal article supplement (PMC6604059)
Supplement: NIHMS1026539-supplement-Supplemental.pdf [file NIHMS1026539-supplement-Supplemental.pdf]

APPENDIX

Table A1. Number of colleges by sport and year

| Year | Fall Sports |     |      |      |     |      |     | Winter Sports |     | Spring Sports |      |
|------|-------------|-----|------|------|-----|------|-----|---------------|-----|---------------|------|
|      | MSOC        | MFB | MRUG | WSOC | WFH | WRUG | WVB | MBB           | WBB | MLAX          | WLAX |
| 2008 | 3           |     |      | 4    | 3   |      |     | 6             | 6   |               |      |
| 2009 | 6           | 2   | 3    | 6    | 3   | 3    | 1   | 6             | 6   | 6             | 6    |
| 2010 | 5           | 1   | 3    | 5    | 3   | 3    | 1   | 8             | 8   | 7             | 5    |
| 2011 | 4           |     | 2    | 4    | 3   | 2    | 1   | 4             | 4   | 7             | 5    |
| 2012 |             |     |      |      |     |      |     |               |     | 5             | 4    |

Collegiate Abbreviations: MSOC, men's soccer; MFB, men's football; MRUG, men's rugby; WSOC, women's soccer; WFH, women's field hockey; WRUG, women's rugby; WVB, women's volleyball; MBB, men's basketball; WBB, women's basketball; MLAX, men's lacrosse; WLAX, women's lacrosse

Table A2. Number of high schools by sport and year

| Year | Fall Sports |     |      |     | Winter Sports |     | Spring Sports |      |
|------|-------------|-----|------|-----|---------------|-----|---------------|------|
|      | BSOC        | BFB | GSOC | GFH | BBB           | GBB | BLAX          | GLAX |
| 2008 | 6           |     | 6    | 6   | 12            | 12  |               |      |
| 2009 | 18          | 12  | 18   | 12  | 18            | 18  | 13            | 11   |
| 2010 | 18          | 11  | 17   | 11  | 18            | 18  | 14            | 12   |
| 2011 | 17          | 11  | 17   | 11  | 17            | 17  | 14            | 12   |
| 2012 |             |     |      |     |               |     | 14            | 12   |

High School Abbreviations: BSOC, boys' soccer; BFB, boys' football; GSOC, girls' soccer; GFH, girls' field hockey; BBB, boys' basketball; GBB, girls' basketball; BLAX, boys' lacrosse; GLAX, girls' lacrosse

Table A3. First-time noncontact ACL injury rate estimates based on Poisson regression results and corrected exposure days combined with comparison data from other studies

| Sport               | Estimated injury rate per 1000 person-days of exposure |             |           |             | Comparison rates per 1000 person-days of exposure                                                   | First author, Year published                                                                                                                                                                                  | Descriptive information                                                                                                                                                                                    |
|---------------------|--------------------------------------------------------|-------------|-----------|-------------|-----------------------------------------------------------------------------------------------------|---------------------------------------------------------------------------------------------------------------------------------------------------------------------------------------------------------------|------------------------------------------------------------------------------------------------------------------------------------------------------------------------------------------------------------|
|                     | Original                                               | 95% CI      | Corrected | 95% CI      |                                                                                                     |                                                                                                                                                                                                               |                                                                                                                                                                                                            |
| <b>Male college</b> |                                                        |             |           |             |                                                                                                     |                                                                                                                                                                                                               |                                                                                                                                                                                                            |
| Soccer              | 0.146                                                  | 0.087-0.245 | 0.186     | 0.111-0.312 | 0.123*<br>0.13,* 0.120**<br>0.081*<br>0.04,* 0.04,** 0.11#<br>0.13,* 0.11,** 0.12#<br>0.09<br>0.12* | Harmon, 1998 <sup>14</sup><br>Arendt, 1999 <sup>3</sup><br>Gwinn, 2000 <sup>13</sup><br>Agel, 2005 <sup>1</sup><br>Mihata, 2006 <sup>25</sup><br>Hootman, 2007 <sup>17</sup><br>Prodromos, 2007 <sup>30</sup> | *overall for Divisions I, II, III<br>*1989-1993, **1994-1998<br>*ACL tears requiring surgery only<br>*noncontact, **contact, #overall<br>*1989-1994, **1994-2004, #1989-2004<br>*weighted means for groups |
| Basketball          | 0.070                                                  | 0.038-0.127 | 0.089     | 0.049-0.161 | 0.080*<br>0.07,* 0.101**<br>0.089*<br>0.04,* 0.02,** 0.08#<br>0.07,* 0.08,** 0.08#<br>0.07<br>0.08* | Harmon, 1998 <sup>14</sup><br>Arendt, 1999 <sup>3</sup><br>Gwinn, 2000 <sup>13</sup><br>Agel, 2005 <sup>1</sup><br>Mihata, 2006 <sup>25</sup><br>Hootman, 2007 <sup>17</sup><br>Prodromos, 2007 <sup>30</sup> | *overall for Divisions I, II, III<br>*1989-1993, **1994-1998<br>*ACL tears requiring surgery only<br>*noncontact, **contact, #overall<br>*1989-1994, **1994-2004, #1989-2004<br>*weighted means for groups |
| Lacrosse            | 0.083                                                  | 0.050-0.138 | 0.105     | 0.063-0.176 | 0.17<br>0.12<br>0.20<br>0.17*                                                                       | Mihata, 2006 <sup>25</sup><br>Hootman, 2007 <sup>17</sup><br>Mountcastle, 2007 <sup>26</sup><br>Prodromos, 2007 <sup>30</sup>                                                                                 | *weighted means for groups                                                                                                                                                                                 |
| Football            | 0.139                                                  | 0.071-0.273 | 0.177     | 0.090-0.348 | 0.36,* 0.03,** 0.83, # 0.05###<br>0.18<br>0.23<br>0.806,* 0.08,** 0.142#                            | Dick, 2007 <sup>5</sup><br>Hootman, 2007 <sup>17</sup><br>Mountcastle, 2007 <sup>26</sup><br>Dragoo, 2012 <sup>7</sup>                                                                                        | *noncontact/games, **noncontact/practices, #contact/games, ##contact/practices<br>*games, **practices, #overall                                                                                            |
| Rugby               | 0.185                                                  | 0.091-0.376 | 0.235     | 0.115-0.479 | 0.176*<br>0.18*                                                                                     | Gwinn, 2000 <sup>13</sup><br>Prodromos, 2007 <sup>30</sup>                                                                                                                                                    | *ACL tears requiring surgery only<br>*weighted means for groups                                                                                                                                            |

Table A3. (continued)

| Sport                     | Estimated injury rate per 1000 person-days of exposure |             |       |             | Comparison rates per 1000 person-days of exposure                                                                                                                               | First author, Year published                                                                                                                                                                                                                                           | Descriptive information                                                                                                                                                                                                                                                                                                                                                                                                                                                                                    |
|---------------------------|--------------------------------------------------------|-------------|-------|-------------|---------------------------------------------------------------------------------------------------------------------------------------------------------------------------------|------------------------------------------------------------------------------------------------------------------------------------------------------------------------------------------------------------------------------------------------------------------------|------------------------------------------------------------------------------------------------------------------------------------------------------------------------------------------------------------------------------------------------------------------------------------------------------------------------------------------------------------------------------------------------------------------------------------------------------------------------------------------------------------|
| <b>Female college</b>     |                                                        |             |       |             |                                                                                                                                                                                 |                                                                                                                                                                                                                                                                        |                                                                                                                                                                                                                                                                                                                                                                                                                                                                                                            |
| Soccer                    | 0.307                                                  | 0.195-0.482 | 0.391 | 0.249-0.614 | 0.321*<br>0.31,* 0.330**<br>0.768*<br>0.13,* 0.10,** 0.31#<br>0.31,* 0.32,** 0.32#<br>0.28<br>0.32*<br>0.057,* 0.189,** 0.199,# 0.340##<br><br>0.057,* 0.113,** 0.170,# 0.189## | Harmon, 1998 <sup>14</sup><br>Arendt, 1999 <sup>3</sup><br>Gwinn, 2000 <sup>13</sup><br>Agel, 2005 <sup>1</sup><br>Mihata, 2006 <sup>25</sup><br>Hootman, 2007 <sup>17</sup><br>Prodromos, 2007 <sup>30</sup><br>Gilchrist, 2008 <sup>9</sup><br><br>(Gilchrist cont.) | *overall Divisions I, II, III<br>*1989-1993, **1994-1998<br>*ACL tears requiring surgery only<br>*noncontact, **contact, #overall<br>*1989-1994, **1994-2004, #1989-2004<br><br>*weighted means for groups<br>*noncontact w/conditioning, **noncontact control, #noncontact & contact w/conditioning, ##noncontact & contact control<br>*first-time noncontact w/conditioning, **first-time noncontact control, #first-time noncontact & contact w/conditioning, ##first-time noncontact & contact control |
| Basketball                | 0.146                                                  | 0.084-0.253 | 0.186 | 0.108-0.322 | 0.297*<br>0.29,* 0.289**<br>0.478*<br>0.16,* 0.06,** 0.27#<br>0.29,* 0.28,** 0.28#<br>0.23<br>0.39<br>0.29*<br>0.18<br>0.17<br>0.18*                                            | Harmon, 1998 <sup>14</sup><br>Arendt, 1999 <sup>3</sup><br>Gwinn, 2000 <sup>13</sup><br>Agel, 2005 <sup>1</sup><br>Mihata, 2006 <sup>25</sup><br>Hootman, 2007 <sup>17</sup><br>Mountcastle, 2007 <sup>26</sup><br>Prodromos, 2007 <sup>30</sup>                       | *overall Divisions I, II, III<br>*1989-1993, **1994-1998<br>*ACL tears requiring surgery only<br>*noncontact, **contact, #overall<br>*1989-1994, **1994-2004, #1989-2004<br><br>*weighted means for groups                                                                                                                                                                                                                                                                                                 |
| Lacrosse                  | 0.174                                                  | 0.106-0.285 | 0.221 | 0.135-0.363 | 0.18<br>0.17<br>0.18*                                                                                                                                                           | Mihata, 2006 <sup>25</sup><br>Hootman, 2007 <sup>17</sup><br>Prodromos, 2007 <sup>30</sup>                                                                                                                                                                             | *weighted means for groups                                                                                                                                                                                                                                                                                                                                                                                                                                                                                 |
| Field hockey              | 0.082                                                  | 0.033-0.204 | 0.105 | 0.042-0.260 | 0.07                                                                                                                                                                            | Hootman, 2007 <sup>17</sup>                                                                                                                                                                                                                                            |                                                                                                                                                                                                                                                                                                                                                                                                                                                                                                            |
| Rugby                     | 0.387                                                  | 0.197-0.759 | 0.493 | 0.251-0.967 | 0.36<br>0.354*<br>0.36*                                                                                                                                                         | Levy, 1997 <sup>21</sup><br>Gwinn, 2000 <sup>13</sup><br>Prodromos, 2007 <sup>30</sup>                                                                                                                                                                                 | *ACL tears requiring surgery only<br>*weighted means for groups                                                                                                                                                                                                                                                                                                                                                                                                                                            |
| Volleyball                | 0.447                                                  | 0.063-3.173 | 0.569 | 0.080-4.041 | 0.09                                                                                                                                                                            | Hootman, 2007 <sup>17</sup>                                                                                                                                                                                                                                            |                                                                                                                                                                                                                                                                                                                                                                                                                                                                                                            |
| <b>Male high school</b>   |                                                        |             |       |             |                                                                                                                                                                                 |                                                                                                                                                                                                                                                                        |                                                                                                                                                                                                                                                                                                                                                                                                                                                                                                            |
| Soccer                    | 0.062                                                  | 0.038-0.099 | 0.078 | 0.049-0.126 | 0.129,* 0.014,** 0.048#<br>0.050                                                                                                                                                | Joseph, 2013 <sup>18</sup><br>Swenson, 2013 <sup>34</sup>                                                                                                                                                                                                              | *competition, **practice, #overall                                                                                                                                                                                                                                                                                                                                                                                                                                                                         |
| Basketball                | 0.029                                                  | 0.016-0.053 | 0.037 | 0.021-0.067 | 0.07<br>0.02*<br>0.055,* 0.009,** 0.023#<br>0.024                                                                                                                               | Messina, 1999 <sup>24</sup><br>Prodromos, 2007 <sup>30</sup><br>Joseph, 2013 <sup>18</sup><br>Swenson, 2013 <sup>34</sup>                                                                                                                                              | *weighted means for groups<br>*competition, **practice, #overall                                                                                                                                                                                                                                                                                                                                                                                                                                           |
| Lacrosse                  | 0.035                                                  | 0.020-0.594 | 0.044 | 0.026-0.076 | 0.079                                                                                                                                                                           | Swenson, 2013 <sup>34</sup>                                                                                                                                                                                                                                            |                                                                                                                                                                                                                                                                                                                                                                                                                                                                                                            |
| Football                  | 0.059                                                  | 0.032-0.106 | 0.075 | 0.041-0.136 | 0.11*<br>0.467,* 0.041,** #0.111#<br>0.117                                                                                                                                      | Prodromos, 2007 <sup>30</sup><br>Joseph, 2013 <sup>18</sup><br>Swenson, 2013 <sup>34</sup>                                                                                                                                                                             | *weighted means for groups<br>*competition, **practice, #overall                                                                                                                                                                                                                                                                                                                                                                                                                                           |
| <b>Female high school</b> |                                                        |             |       |             |                                                                                                                                                                                 |                                                                                                                                                                                                                                                                        |                                                                                                                                                                                                                                                                                                                                                                                                                                                                                                            |
| Soccer                    | 0.129                                                  | 0.087-0.192 | 0.164 | 0.111-0.244 | 0.09,* 0.49**<br>—,* 0.107**<br>*: 0.08,** 0.45#<br>0.352,* 0.024,** 0.122#<br>0.117                                                                                            | Mandelbaum, 2005 <sup>23</sup><br>Pfeiffer, 2006 <sup>28</sup><br><br>Prodromos, 2007 <sup>30</sup><br>Joseph, 2013 <sup>18</sup><br>Swenson, 2013 <sup>34</sup>                                                                                                       | *noncontact/PEP trained, **noncontact control<br>*first-time noncontact/KLIP trained,**first-time noncontact control<br>*weighted means for groups: **trained, #untrained<br>*competition, **practice, #overall                                                                                                                                                                                                                                                                                            |
| Basketball                | 0.061                                                  | 0.036-0.105 | 0.078 | 0.046-0.133 | 0.03<br>0.476,* 0.111**<br>*: 0.45,** 0.10#<br>0.266,* 0.033,** 0.103#<br>0.107                                                                                                 | Messina, 1999 <sup>11, 24, 30</sup><br>Pfeiffer, 2006 <sup>28</sup><br><br>Prodromos, 2007 <sup>30</sup><br>Joseph, 2013 <sup>18</sup><br>Swenson, 2013 <sup>34</sup>                                                                                                  | *first-time noncontact/KLIP trained, **first-time noncontact control<br>*weighted means for groups: **trained, #untrained<br>*competition, **practice, #overall                                                                                                                                                                                                                                                                                                                                            |
| Lacrosse                  | 0.073                                                  | 0.044-0.121 | 0.093 | 0.056-0.154 | 0.078                                                                                                                                                                           | Swenson, 2013 <sup>34</sup>                                                                                                                                                                                                                                            |                                                                                                                                                                                                                                                                                                                                                                                                                                                                                                            |
| Field hockey              | 0.035                                                  | 0.014-0.095 | 0.044 | 0.018-0.108 | 0.031                                                                                                                                                                           | Swenson, 2013 <sup>34</sup>                                                                                                                                                                                                                                            |                                                                                                                                                                                                                                                                                                                                                                                                                                                                                                            |

**Figure A1.** SurveyMonkey Exposure Questionnaire  
(SurveyMonkey, Inc., Palo Alto, CA, USA; [www.surveymonkey.com](http://www.surveymonkey.com))

The image shows a screenshot of a SurveyMonkey questionnaire titled "Daily exposure log". The form is divided into sections, each starting with a question number and an asterisk. The questions are:

- 1. Date of event:** A date picker with fields for MM, DD, and YYYY.
- 2. School:** A dropdown menu with options for "College" and "High School".
- 3. Sport:** A dropdown menu with a "Sport" label.
- 4. Sex:** Radio buttons for "Male" and "Female".
- 5. Level:** Radio buttons for "Intercollegiate", "Varsity (High School)", and "Junior Varsity (High School)".
- 6. Event type:** Radio buttons for "Practice" and "Game".
- 7. Number of players participating:** A text input field.
- 8. My name is:** A text input field.
